# Supplementary material for: Spatial temperature mapping within polymer nanocomposites undergoing ultrafast photothermal heating via gold nanorods
Source: Royal Society of Chemistry journal article supplement (doi:10.1039/c4nr05179c), 2014-01-01
Supplement: c4nr05179c1.pdf [file c4nr05179c1.pdf]

## Supporting Information

### **Spatial Temperature Mapping within Polymer Nanocomposites Undergoing Ultrafast Photothermal Heating via Gold Nanorods**

*Somsubhra Maity, Wei-Chen Wu, Chao Xu, Joseph B. Tracy, Kenan Gundogdu, Jason R.*

*Bochinski\*, and Laura I. Clarke\**

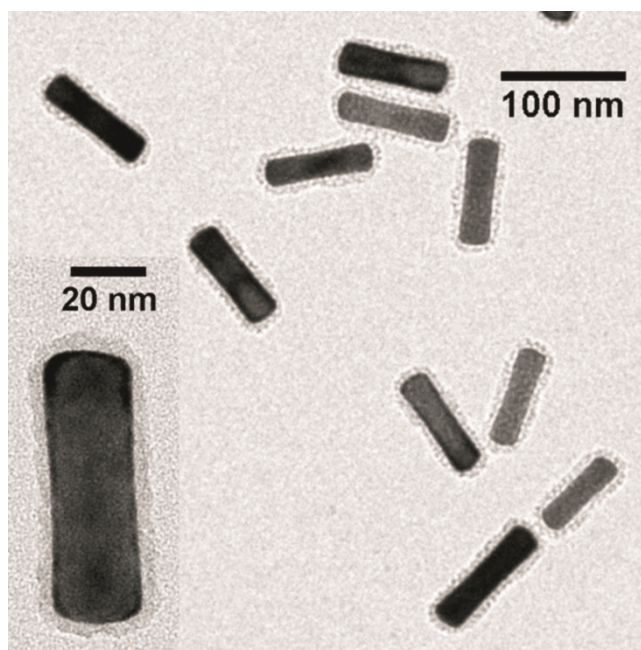

**Figure S1. TEM image (at low and high magnifications) of PEGylated silica-coated GNRs used in this study**
